# Supplementary material for: Characterization of platinum(II) complexes exhibiting inhibitory activity against the 20S proteasome
Source: R Soc Open Sci. 2020 Aug 19;7(8):200545. doi: 10.1098/rsos.200545 (PMC7481701; doi:10.1098/rsos.200545)
Supplement: ff-target activity of Pt complexes, inhibitory activities of noegative cotrol against proteasomes and chemical structure of N-acetyl cysteine adduct [file rsos200545supp1.docx]

Electronic supplementary material

Characterization of platinum(II) complexes exhibiting inhibitory activity against 20S proteasome

Tatsuto Kiwada1, Hiromu Katakasu2, Serina Okumura3, and Akira Odani1

1Faculty of Pharmacy, Institute of Medical, Pharmaceutical, and Health Sciences, Kanazawa University, Kakuma-machi, Kanazawa, 920-1192, Japan

2School of Pharmaceutical Sciences, College of Medical, Pharmaceutical and Health Sciences, Kanazawa University,

Kakuma-machi, Kanazawa, 920-1192, Japan

3School of Pharmacy, College of Medical, Pharmaceutical and Health Sciences, Kanazawa University,

Kakuma-machi, Kanazawa, 920-1192, Japan

Corresponding author: Tatsuto Kiwada (kiwada@p.kanazawa-u.ac.jp), Akira Odani (odani@p.kanazawa-u.ac.jp)

Off-target activity against other proteases

Inhibition of cathepsin B

Cathepsin B (50 ng) was incubated in 100 L assay buffer (100 mM sodium actetate, 5 mM EDTA, 5mM DTT; pH 5.5) with different concentrations of platinum complexes and 20 M of the fluorogenic peptide substrate Z-RR-MCA for 1 h at 37°C. After incubation, the production of hydrolyzed AMC groups was measured at 450 nm (λex = 365 nm).

Inhibition of -chymotrypsin

**
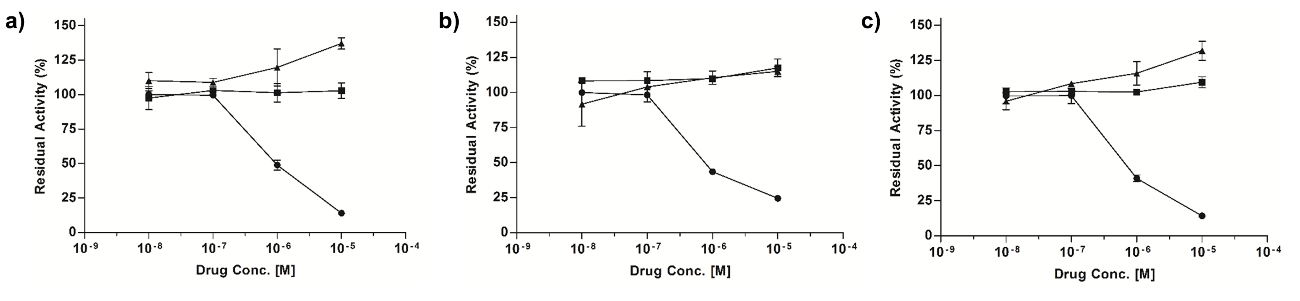
**In 100 L assay buffer (25 mM HEPES and 0.5 mM EDTA, pH 7.8), -chymotrypsin (50 ng) was incubated with different concentrations of platinum complexes and 25 M of the fluorogenic peptide substrate Suc-LLVA-MCA for 1 h at 37°C. After incubation, the production of hydrolyzed AMC groups was measured at 450 nm (λex = 365 nm).

**Figure S1**. Residual activity of cathepsin B (■), -chymotrypsin (▲) and 20S proteasome (●) in the presence of complex **1**(a), complex **2** (b) and complex **3** (c).

**Inhibitory activity of N-9-anthracenylmethyl-1,2-ethanediamine and (ethylenediamine)bispyridine platinum(II) chloride against the purified 20S proteasome**


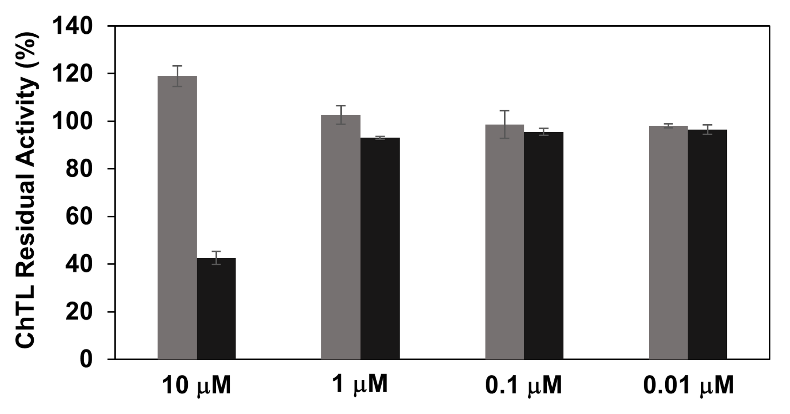
For the proteasome inhibition assays, the peptide-AMC substrates (25 M Suc-LLVY-AMC) and inhibitors were added to assay solutions. The assay buffer had the following composition: 25 mM HEPES, 0.5 mM EDTA, 0.03% SDS (pH 8.0). Human erythrocyte 20S proteasome (100 ng) was added to the assay buffer containing substrates and inhibitors at a final volume of 100 L. After incubation at 37°C for 1 h, the fluorescence emission spectrum at 450 nm (λex, 365 nm) was measured by using a fluorescence microplate reader.

**Figure S2**. Inhibitory rate of (ethylenediamine)bispyridine platinum (II) chloride (gray) and N-9-anthracenylmethyl-1,2-ethanediamine (black) against ChTL activity of the purified 20S proteasome.

**Inhibitory activity of N-9-anthracenylmethyl-1,2-ethanediamine against the 20S proteasome in the whole cell lysate**

For the determination of inhibitory activity in the whole cell lysate, peptide-AMC substrates (50 M Suc-LLVY-AMC), inhibitors, and the whole cell lysate (15 g) were added to the assay solutions. The following assay buffer was used: 25 mM HEPES, 0.5 mM EDTA, 0.03% SDS (pH 8.0). After incubation at 37 °C for 4 h, the fluorescence emission was measured at 450 nm (λex = 365 nm) by using a fluorescence microplate reader.

**
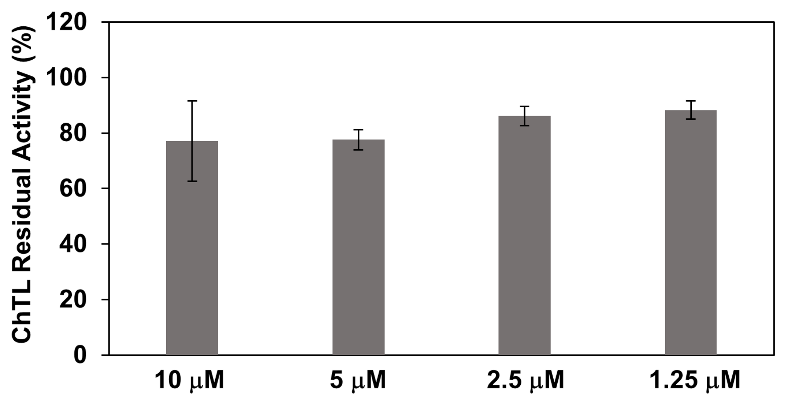
**

**Figure S3**. Inhibitory rate of N-9-anthracenylmethyl-1,2-ethanediamine against ChTL activity of the 20S proteasome in the whole cell lysate.


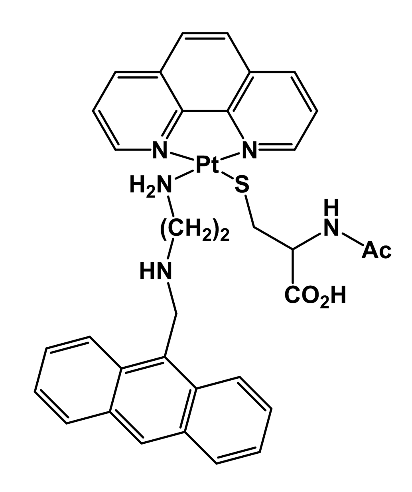


**Figure S4.** Theplausible structure of 1:1 adduct ofcomplex **2** with N-acetylcysteine.
